# Supplementary material for: Familial risk of atrioventricular block in first-degree relatives
Source: PubMed Central journal article supplement — Heart. 2022 Mar 4;108(15):1194–9. doi: 10.1136/heartjnl-2021-320411 (PMC9279841; doi:10.1136/heartjnl-2021-320411), 2022-03-04
Supplement: heartjnl-2021-320411supp001.pdf [file heartjnl-2021-320411supp001.pdf]

**Supplementary Table 1.** Rate ratio of atrioventricular block in first-degree relatives to index case

| Index case                              | Model 1<br>RR* | 95% CI   | p-value | Model 2<br>RR† | 95% CI   | p-value |
|-----------------------------------------|----------------|----------|---------|----------------|----------|---------|
| Any father, mother or sibling >65 years | 1.9            | 1.5-2.3  | <0.001  | 1.8            | 1.4-2.2  | <0.001  |
| Any father, mother or sibling <65 years | 4.9            | 3.5-6.7  | <0.001  | 4.3            | 3.1-6.0  | <0.001  |
| Mother >65 years                        | 2.0            | 1.5-2.7  | <0.001  | 1.9            | 1.4-2.5  | <0.001  |
| Mother < 65 years                       | 7.4            | 4.2-13.1 | <0.001  | 6.8            | 3.9-12.0 | <0.001  |
| Father > 65 years                       | 1.8            | 1.4-2.4  | <0.001  | 1.7            | 1.3-2.3  | <0.001  |
| Father < 65 years                       | 3.7            | 2.0-6.6  | <0.001  | 3.3            | 1.8-6.0  | <0.001  |

\*Adjusted for age, sex, and calendar time (Model 1). †Adjusted for age, sex, calendar time, heart failure, diabetes, atrial fibrillation/flutter, and myocardial infarction (Model 2).
